# Supplementary material for: NK cell infiltration is associated with improved overall survival in solid cancers: A systematic review and meta-analysis
Source: PubMed Central journal article supplement — Transl Oncol. 2020 Nov 10;14(1):100930. doi: 10.1016/j.tranon.2020.100930 (PMC7670197; doi:10.1016/j.tranon.2020.100930), 2020-11-10
Supplement: mmc1.pdf [file mmc1.pdf]

## SUPPLEMENTAL FIGURES & TABLES

### Supplemental Data 1. Search terms applied to PubMed & EMBASE

Searches were conducted on February 11<sup>th</sup>, 2020 at 4:30PM.

PubMed search: “*Search (((prognostic value OR survival OR outcome [Title/Abstract]) AND (NK cells OR innate lymphoid cell[Title/Abstract]) AND (tumor OR tumour OR infiltration[Title/Abstract]))*”

EMBASE search: “*Search ((prognostic[All Fields] AND value[All Fields]) OR ("mortality"[Subheading] OR "mortality"[All Fields] OR "survival"[All Fields] OR "survival"[MeSH Terms]) OR outcome[Title/Abstract]) AND (("killer cells, natural"[MeSH Terms] OR ("killer"[All Fields] AND "cells"[All Fields] AND "natural"[All Fields]) OR "natural killer cells"[All Fields] OR ("nk"[All Fields] AND "cells"[All Fields]) OR "nk cells"[All Fields]) OR innate lymphoid cell[Title/Abstract]) AND (("tumour"[All Fields] OR "neoplasms"[MeSH Terms] OR "neoplasms"[All Fields] OR "tumor"[All Fields]) OR ("tumour"[All Fields] OR "neoplasms"[MeSH Terms] OR "neoplasms"[All Fields] OR "tumor"[All Fields]) OR infiltration[Title/Abstract])*”

### Supplemental Data 2. R code

R Code for Meta-analysis:

```
> meta <- read.csv("~/Desktop/meta.csv")
> library(meta)
> library(metafor)
> m.hksj <- metagen(TE, seTE, data =meta, studlab = paste(studlab), comb.fixed = FALSE,
comb.random = TRUE, method.tau = "SJ", hakn = TRUE, prediction = TRUE, sm = "SMD")
> m.hksj
```
